# Supplementary material for: Co-delivery of doxorubicin and itraconazole by Pluronic® P123 coated liposomes to enhance the anticancer effect in breast cancers
Source: Royal Society of Chemistry journal article supplement (doi:10.1039/c8ra03787f), 2018-01-01
Supplement: c8ra03787f1.pdf [file c8ra03787f1.pdf]

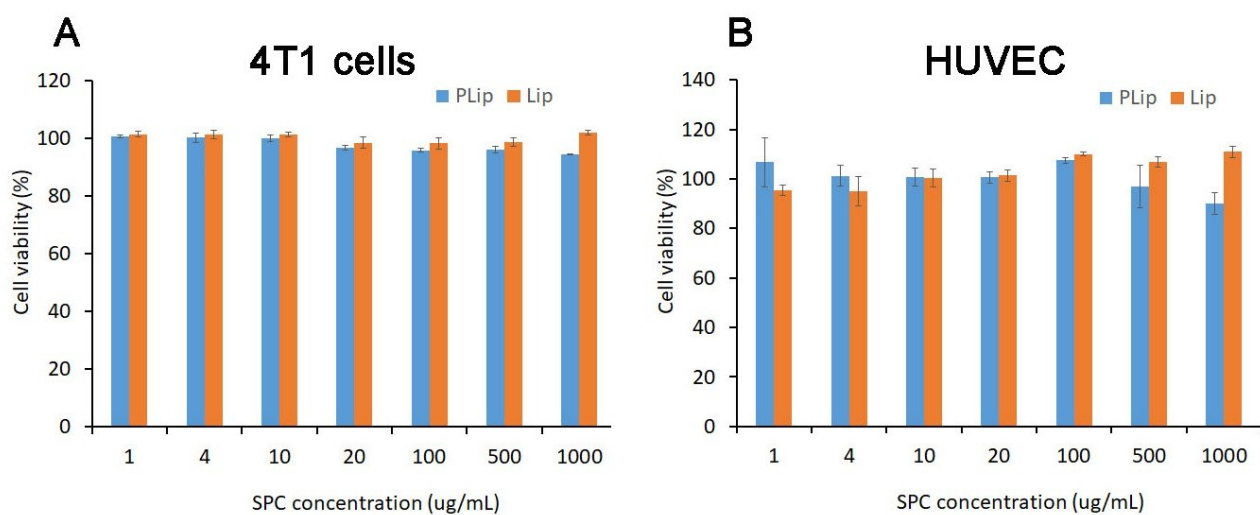

**Figure SI 1** *In vitro* cytotoxicity assay. (A) The cell viability of Lip and PLip against 4T1 cells for 48 hours. (B) The cell viability of Lip and PLip against primary HUVEC cells for 48 hours. Data represent as mean  $\pm$  standard deviation (n=6).

**A**

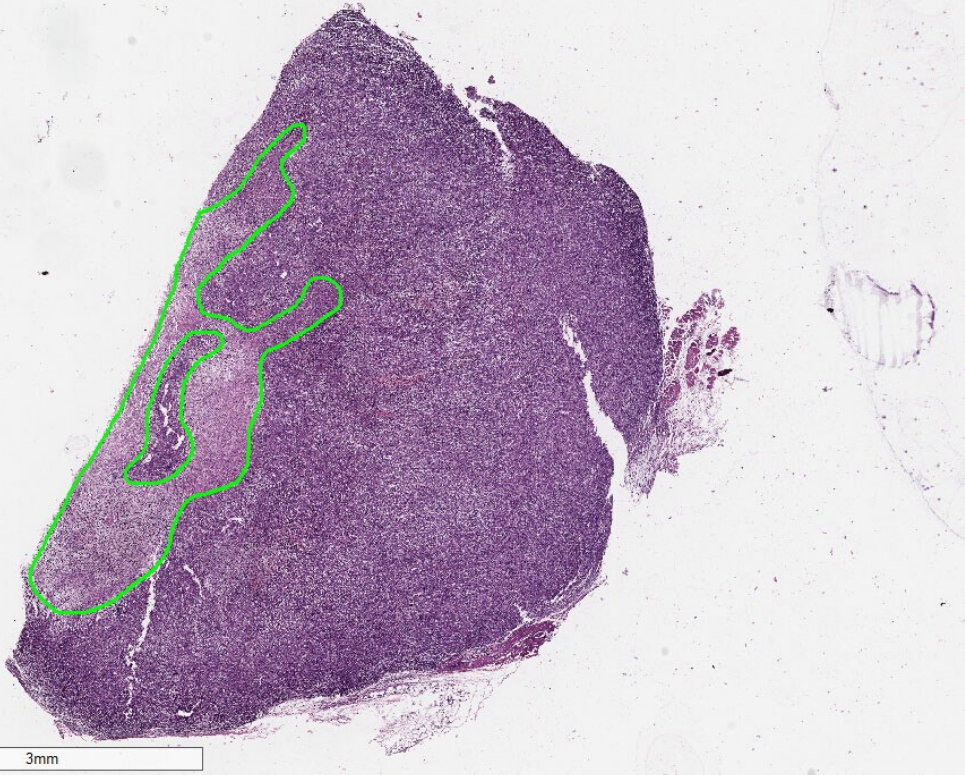

**B**

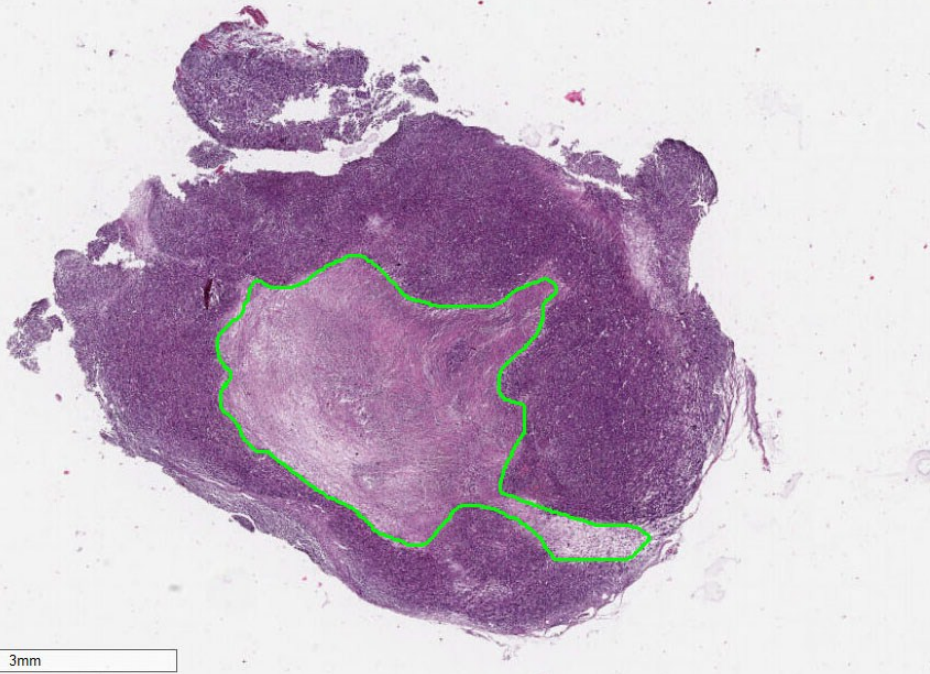



**C**

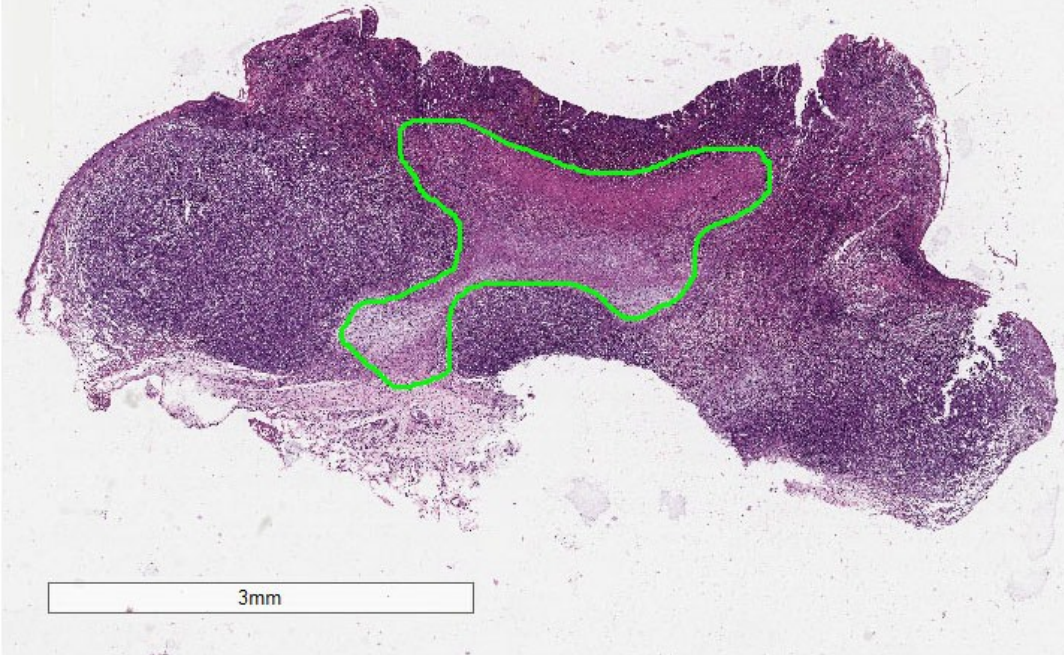

**D**

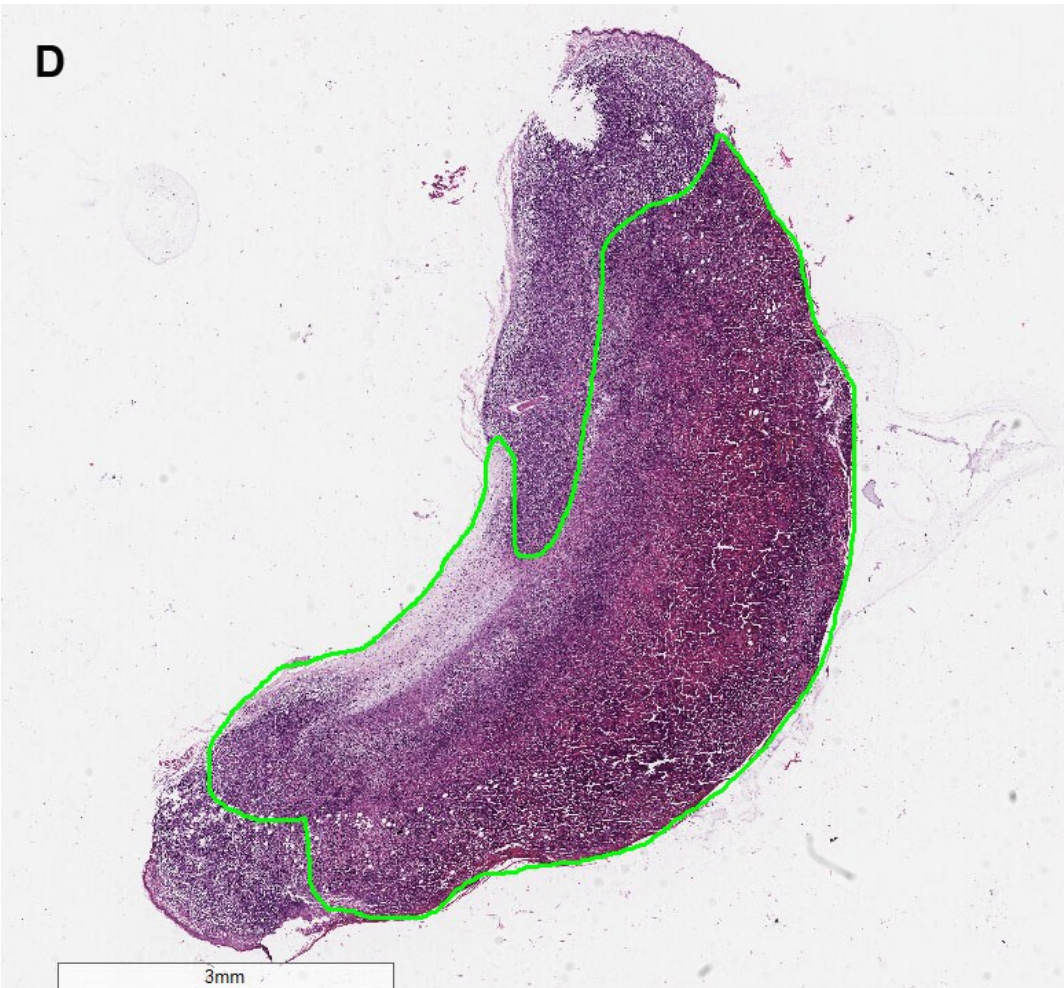

**Figure SI 2** Whole slide digital imaging of tumor tissues of different treatment groups: NaCl (A), DOX (5mg/kg, every three days) (B), ITZ (2.5mg/kg, every three days) (C), ITZ/DOX-PLip (DOX 5mg/kg, ITZ 2.5mg/kg, every three days) (D).
